# Supplementary material for: Divergent dimethylarginine dimethylaminohydrolase isoenzyme expression in the central nervous system
Source: Research Square preprint supplement (doi:10.21203/rs.3.rs-324741/v1), 2021-03-19
Supplement: Supplementary file 1 [file 0f44a6dc02bdf523b0122760.xlsx]

## Sheet: Tabelle1
Kozlova et all., Divergent dimethylarginine dimethylaminohydrolase isoenzyme expression in the central nervous system; Corresponding author: Nadine Bernhardt, PhD, E-Mail: nadine.bernhardt@uniklinikum-dresden.de
Table S1 Validation of anti-DDAH1 antibodies.
ID	Brand	Antigen	Species reactivity	WB	ICC/IF	IHC mice	Rat	Human	References
2231	Abcam	TCCSVLINKKVDS (corresponding to C terminal amino acids 272-284 of Human DDAH1)	Rat, Human (may be cow)	Weak; 1:1000 Recognizes only strong signal (human tissue or stable clone)	Weak; 1:100 (L2, HEK293T)	Brain: 1:200, weak	Brain: 1:200, weak	Medial frontal gyrus: 1:1000, good	Mello et al., 2015
181859	Abcam	Synthetic peptide within Human DDAH1 aa 1-100	Human	Weak, 1:1000 Recognizes only strong signal (human tissue or stable clones)	Good/weak, 1:100 (HEK293T, HUVEC)	Not tested	Not tested	Not tested	No references
bs-11997R	Bioss	Synthetic peptide conjugated to KLH derived from within residues 200 to the C-terminus of Human DDAH1	Human, mouse, rat	Good; 1:1000 band around 40kDa	Weak; 1:100 (HEK293T)	Brain: 1:200, weak Lung: 1:50, good	Not tested	Not tested	No references
PA5-52278	ThermoFisher	Recombinant protein corresponding to Human DDAH1	Human, mouse, rat	Well; 1:1000 band around 40kDa	Well, 1:200 (HUVEC HEK293T, L2, HEPG2)	Brain: 1:500, well	Brain: 1:500, good	Brain: 1:200, unspecific	No references
clone 11A11	from Prof. Masumi Kimoto from Okayama Prefectural University	Recombinant full length hDDAH1	Human, mouse, rat	Well; 1:5000 band around 40kDa	Good, 1:750 (HUVEC, L2, HEK293T)	Brain: 1:500, good	Not tested	Not tested	Yokoro et al., 2012
clone 3H10	from Prof. Masumi Kimoto from Okayama Prefectural University	Recombinant full length hDDAH1	Human, mouse, rat	Not tested	Good; 1:1000 (HEK293T; HUVEC)	Brain: 1:1000, good Lung: 1:1000, good	Not tested	Not tested	Yokoro et al., 2012
clone 1E11	from Prof. Masumi Kimoto from Okayama Prefectural University	Recombinant full length hDDAH1	Human	Not tested	Good; 1:1000 (HEK293T)	Not tested	Not tested	Not tested	Yokoro et al., 2012
HPA006308	MERK	N recombinant protein epitope signature tag (PrEST)	Human, mouse, rat	1:1000; good band around 40kDa	Weak; 1:250 (HUVEC)	Brain: 1:500, well	Brain: 1:500, good	Not tested	Shao Z et. al., 2012
All tested antibodies including source, antigen, and species reactivity, results of western blot (WB), immunocytological (ICC/IF) and immunohistochemical (IHC) staining analyses are provided. For antibody validation, WB, ICC/IF and IHC on rodent and human tissue were established. For WB and ICC, various cell cultures with endogenous DDAH1 activity were used: human embryonic kidney 293 (HEK293T), …
