# Supplementary material for: Divergent dimethylarginine dimethylaminohydrolase isoenzyme expression in the central nervous system
Source: Research Square preprint supplement (doi:10.21203/rs.3.rs-324741/v1), 2021-03-19
Supplement: Supplementary file 2 [file 744d020dde9b6064e74a03e4.xlsx]

## Sheet: Tabelle1
Kozlova et all., Divergent dimethylarginine dimethylaminohydrolase isoenzyme expression in the central nervous system; Corresponding author: Nadine Bernhardt, PhD, E-Mail: nadine.bernhardt@uniklinikum-dresden.de
Table S2 Validation of anti-DDAH2 antibodies.
ID	Brand	Antigen	Species reactivity	WB	ICC/IF	IHC mice	Rat	Human	References
ab1383	Abcam	SSLCLVLSTRPHS	Mouse, rat, dog, human	Weak; 1:1000 band 30kDa	No signal; 1:100 (EA.hy926)	#Not tested	#Not tested	Medial frontal gyrus: 1:1000, good	No references, N.A.
ab232694	Abcam	Recombinant fragment (His-tag) corresponding to Human DDAH2 aa 31-265. (Expressed in E.coli).	Human, pig, (may be mice, rat, cow)	Good; 1:1000 band 30kDa	Good; 1:100 (PC3)	Brain: 1:200, well	Brain: 1:500, weak	Brain: 1:200, unspecific	No references
STJ28540	St John's Lab	Recombinant full length hDDAH2	Human, mouse, rat	Good; 1:1000 band 30kDa	Good, 1:1000 (PC3)	Brain: 1:500, well Lung: 1:200, weak	Brain: 1:500, well	Not tested	No references
arp58611_p050	Aviva System Biology	N-terminal region	Cow, dog, horse, human, mouse, rat	Weak; 1:1000 band 30kDa	Good; 1:200 (HEPG2)	Not tested	Not tested	Not tested	No references
HPA012509	MERK	N(G),N(G)-dimethylarginine dimethylaminohydrolase 2 recombinant protein epitope signature tag (PrEST)	Human, rat, mouse	Good; 1:500 band 30 kDA	Good, 1:50 (PC3)	Brain: 1:50, weak	Not tested	Not tested	Leiper et al., 1999
All tested antibodies including source, antigen, and species reactivity, results of western blot (WB) and immunocytological (ICC/IF) and immunohistochemical (IHC) staining analyses are provided. For antibody validation, WB, ICC/IF and IHC on rodent and human tissue were established. For WB and ICC, various cell cultures with endogenous DDAH2 activity were used: human umbilical vein endothelial ce…
